# Supplementary material
Source: publisher figshare collection journal article supplement (https://scielo.figshare.com/articles/dataset/_/5816559)
Supplement: Supplementary file 1 [file Table_1.xls]

## Sheet: Table_1
<b>Sociodemographic characteristics</b>	<b>N</b>	<b>%</b>	<b>Hypertensive syndrome<sup><a href="#TFN1">a</a></sup></b>		<b><em>p</em></b>
			n	%
Age group (years)					0.739
10-16	456	15.4	20	4.4
17-19	843	28.5	35	4.2
20-24	1661	56.1	80	4.8
Marital status					0.063
Without partner	667	22.6	39	5.8
With partner	2290	77.4	95	4.1
Skin color					0.048
White	495	16.7	33	6.7
Brown	2159	72.9	89	4.1
Black	306	10.3	13	4.2
Adequacy of schooling / age					<0.001
Inadequate	1777	61.0	61	3.4
Proper	1136	39.0	71	6.3
Paid work					0.288
Yes	497	16.8	27	5.4
No	2462	83.2	107	4.3
Funding for prenatal care					0.088
Public	2618	90.1	115	4.4
Private	287	9.9	19	6.6
<strong>Prenatal characteristics</strong>
Adequacy of prenatal care<sup><a href="#TFN2">b</a></sup>					0.101
Suitable	252	8.5	15	6.0
Partially suitable	443	15.0	27	6.1
Inappropriate	2265	76.5	93	4.1
Clinical history of risk<sup><a href="#TFN3">c</a></sup>					<0.001
Yes	49	1.7	22	44.9
No	2911	98.3	113	3.9
Smoke in the first five months of gestation					0.951
Yes	158	5.3	7	4.4
No	2800	94.7	127	4.5
<strong>Characteristics of childbirth</strong>
Source of payment of childbirth					0.052
Public	2821	95.3	124	4.4
Private	139	4.7	11	7.9
Type of birth					<0.001
Normal	1746	59.0	32	1.8
Caesarean	1214	41.0	103	8.5
