# Supplementary material
Source: publisher figshare collection journal article supplement (https://scielo.figshare.com/articles/dataset/_/5816559)
Supplement: Supplementary file 2 [file Table_2.xls]

## Sheet: Table_2
<b>Models</b>	<b>Model I</b>			<b>Model II</b>			<b>Model III</b>
	OR	CI95%	<em>p</em>	OR	CI95%	<em>p</em>	OR	CI95%	<em>p</em>
Distal model
Marital status			0.029			0.022			0.040
Without partner	1.5	1.1-2.3		1.6	1.1-2.4		1.5	1.1-2.3
With partner	1.0	-		1.0	-		1.0	-
Adequacy of schooling/ age			0.002			0.001			0.001
Inadequate	1.8	1.2-2.6		1.9	1.3-2.7		1.9	1.3-2.7
Proper	1.0	-		1.0	-		1.0	-
Intermediate model
Clinical history of risk<sup><a href="#TFN4">a</a></sup>			-			<0.001			<0.001
Yes	-	-		21.5	11.7-39.5		21.7	11.8-39.9
No	-	-		1.0	-		1.0	-
